# Supplementary material
Source: Springer Nature journal article supplement (https://www.springermedizin.de/resource/supplementary/13012_2009_171_MOESM1_ESM.pdf/9629402)
Supplement: MOESM1 [file 9629402]

**n = 75 practices**  
Registered population  $\approx$  500,000  
CKD patients  $\approx$  36,000

Randomisation at practice level at start of year one

**Usual practice**  
n = 25 practices

**Guidelines and prompts**  
n = 25 practices

**Audit-based education**  
n = 25 practices
